# Supplementary material for: Genome and Pangenome Analysis of Lactobacillus hilgardii FLUB—A New Strain Isolated from Mead
Source: MDPI journal article supplement (doi:10.3390/ijms22073780), 2021-04-06
Supplement: s1 [file s1]

**Consensus Threshold:** >50%

**Compare to:** the consensus

Amino acids that match the reference are marked with yellow highlighting.

**Created:** czwartek, 25 mar 2021

**Last Modified:** czwartek, 25 mar 2021
