# Supplementary material for: Genome and Pangenome Analysis of Lactobacillus hilgardii FLUB—A New Strain Isolated from Mead
Source: MDPI journal article supplement (doi:10.3390/ijms22073780), 2021-04-06

## Number of new genes

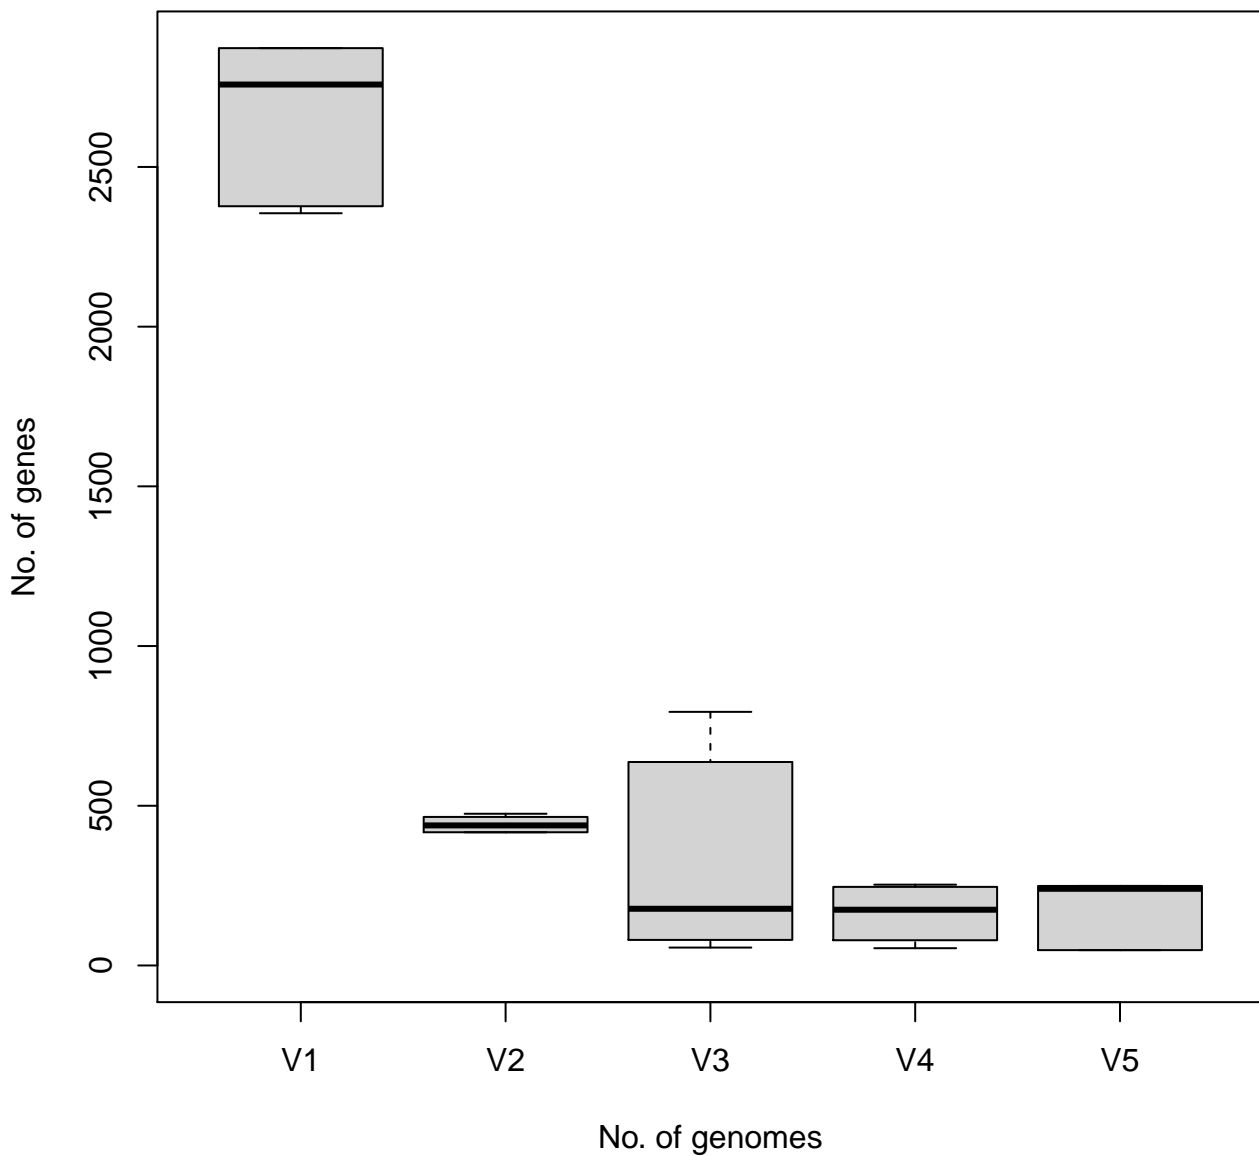

## Number of conserved genes

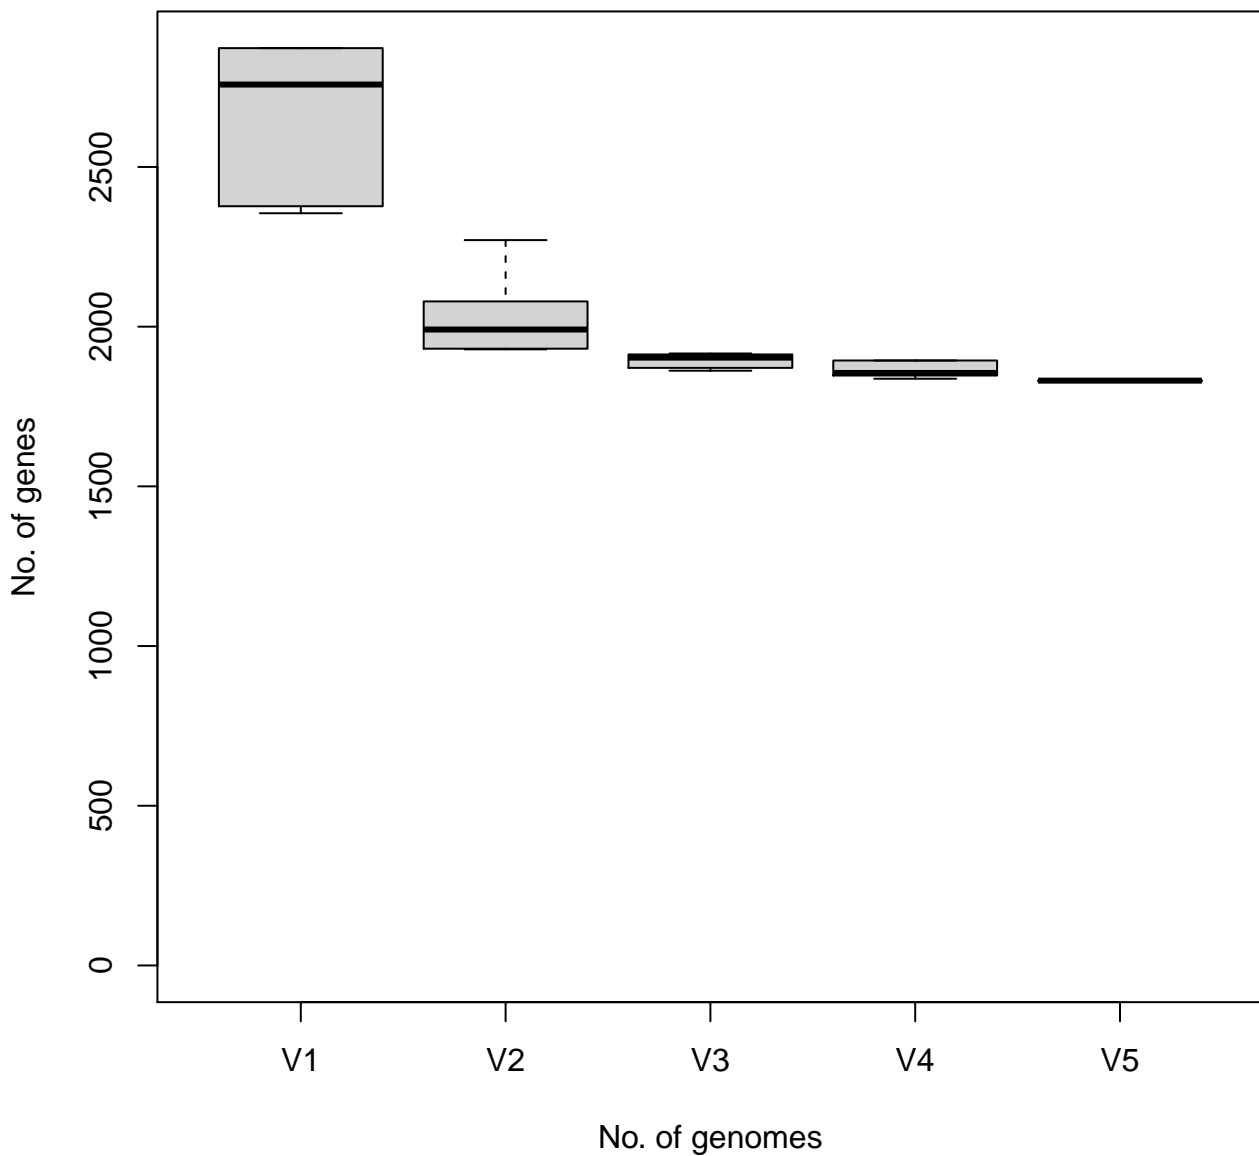

## No. of genes in the pan-genome

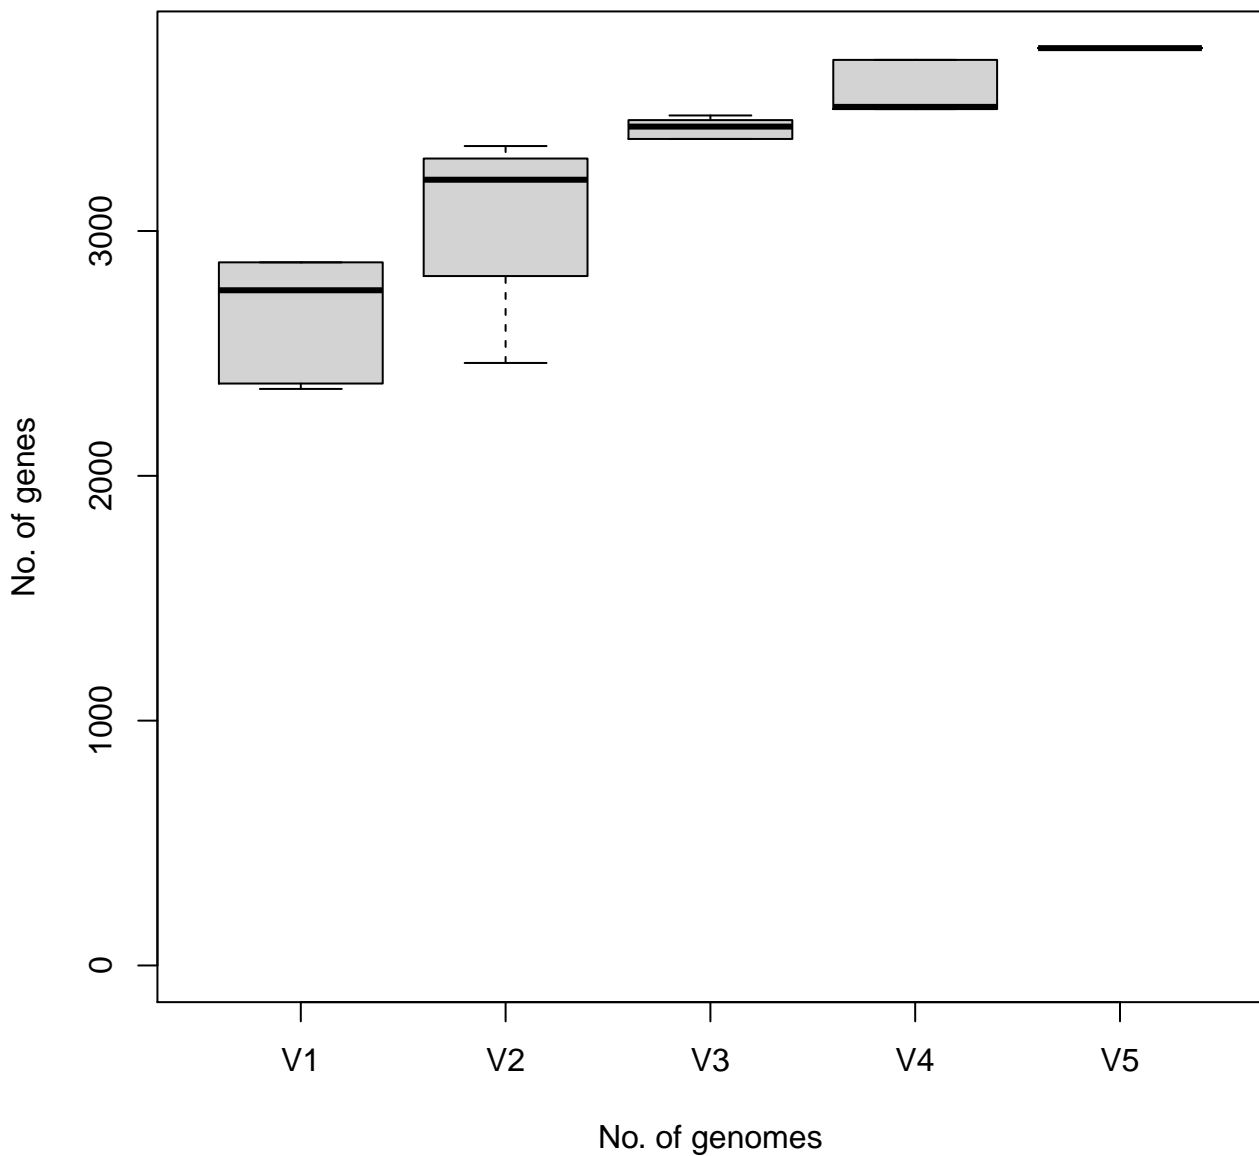

## Number of unique genes

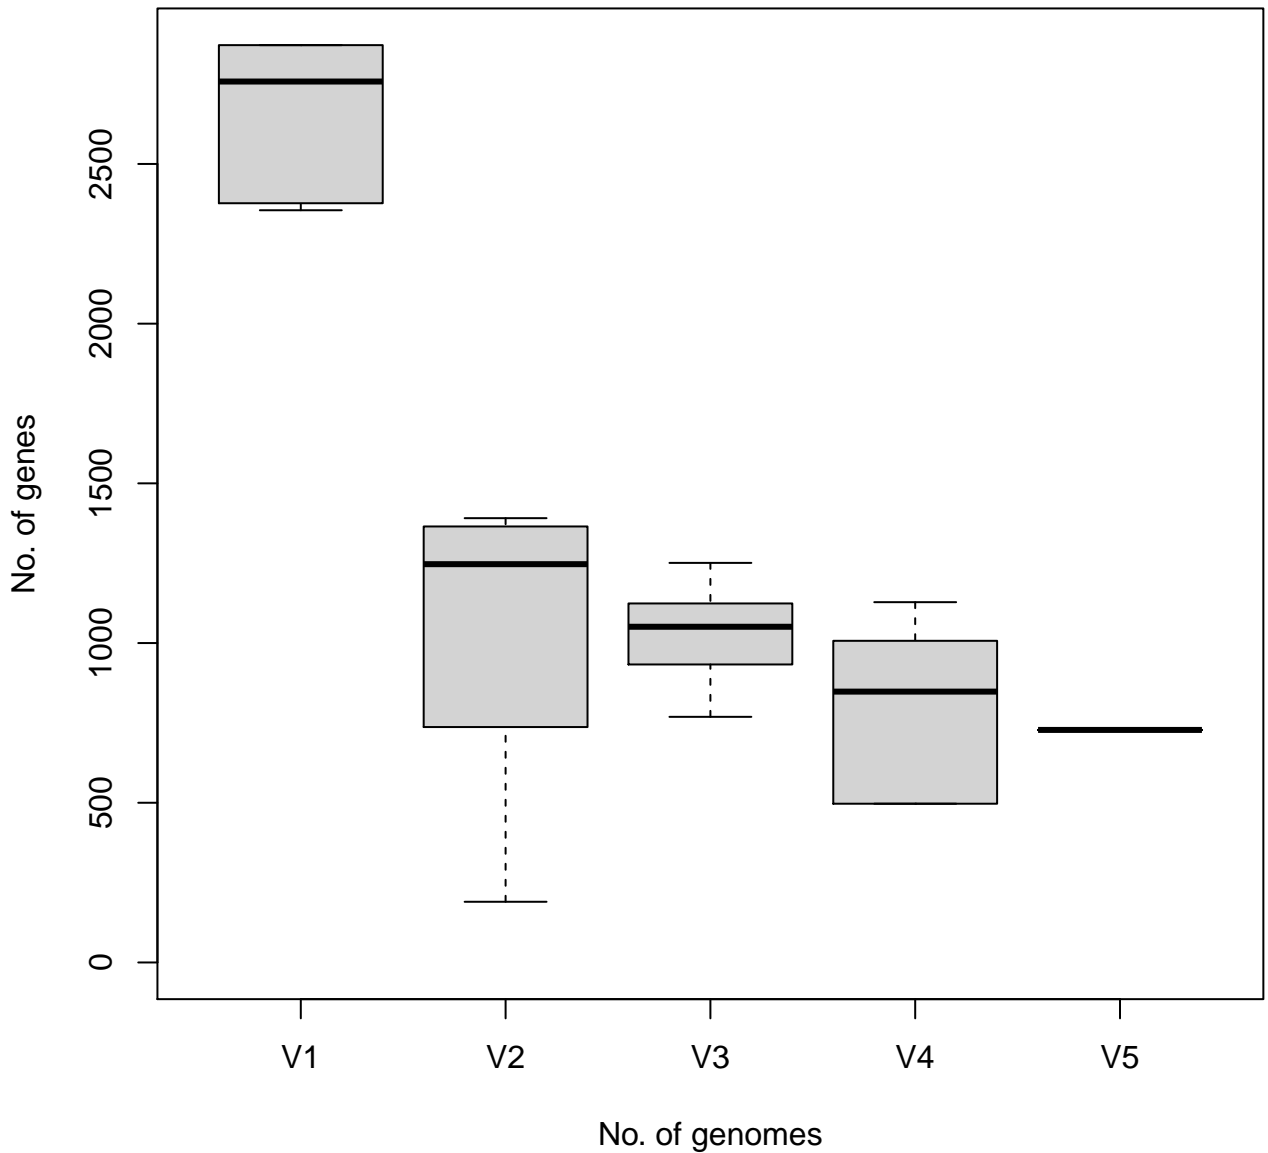

**Number of blastp hits with different percentage identity**

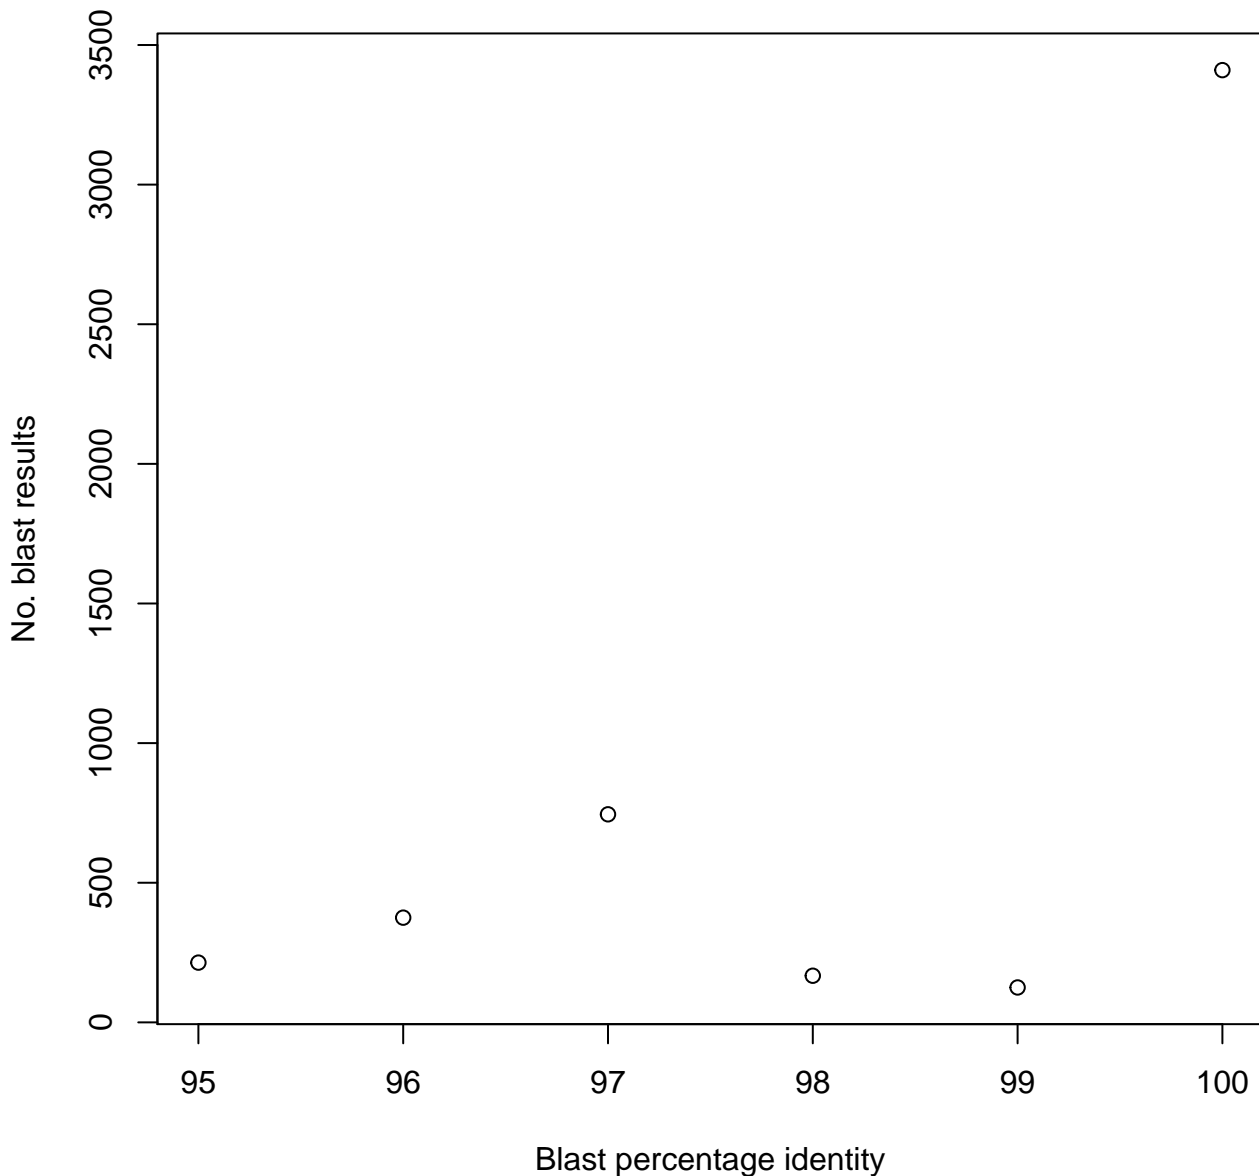

# Key

— Conserved genes

--- Total genes

No. of genes

3000

2000

1000

0

1

2

3

4

5

No. of genomes

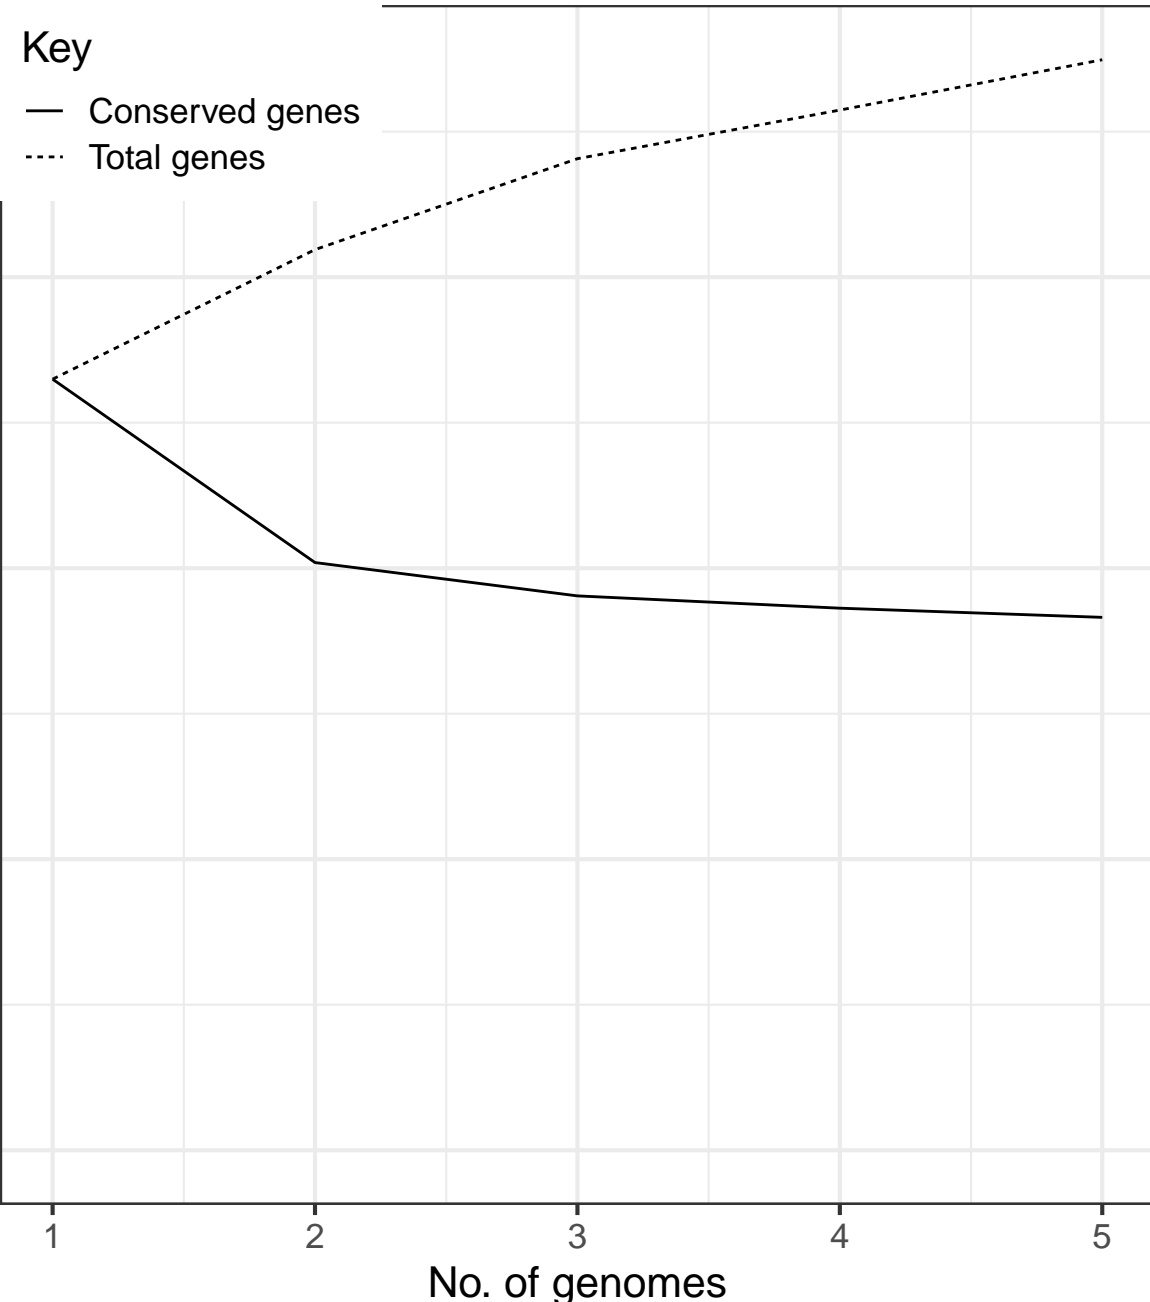

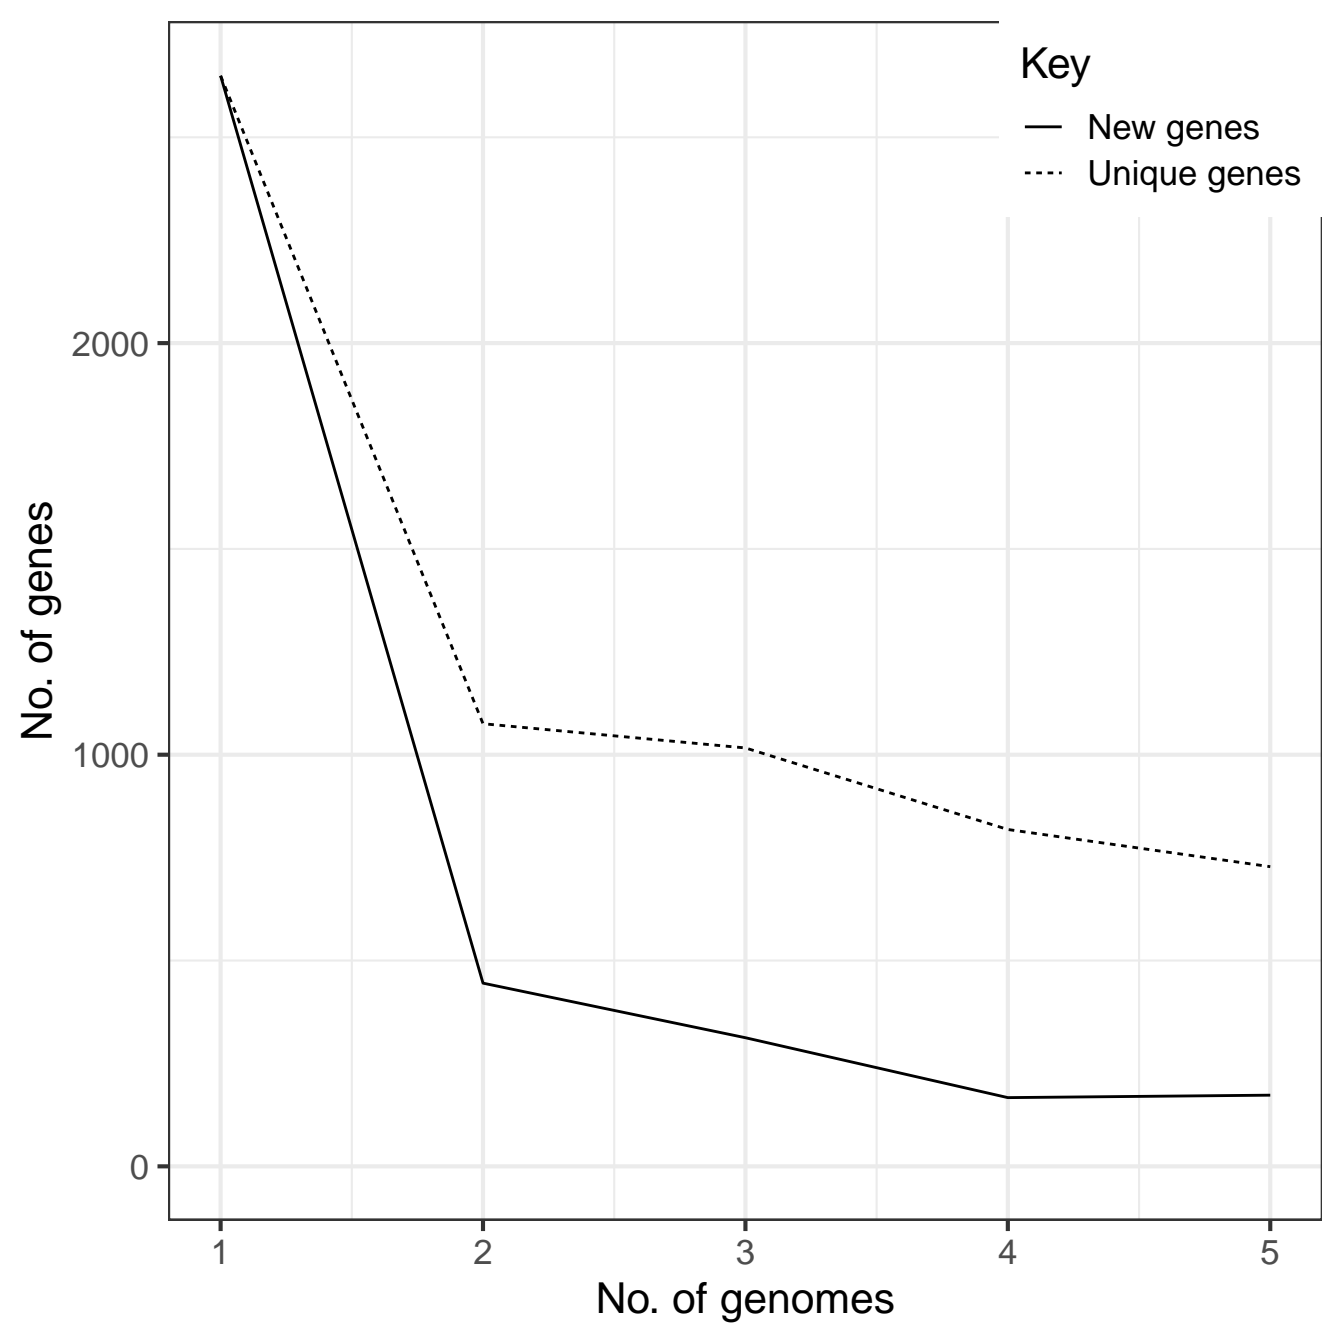

Supplement: s1 [file s1]
